# Supplementary material
Source: MDPI journal article supplement (https://www.mdpi.com/2073-4441/15/5/977)
Supplement: s1 [file s1]

## **Supplementary Information**

### **Modelling and Optimisation of Methylene Blue Adsorption using *Fucus Serratus*, Coconut Shell and Oak Hydrochars**

**E. Danso-Boateng<sup>1\*</sup>, M. Fitzsimmons<sup>1</sup>, A. B. Ross<sup>1</sup>, T. Mariner<sup>1</sup>**

<sup>1</sup>School of Chemical and Process Engineering, University of Leeds, LS2 9JT, UK

\*Corresponding author: e.danso-boateng@leeds.ac.uk

ORCID ID: <https://orcid.org/0000-0003-3555-3118>

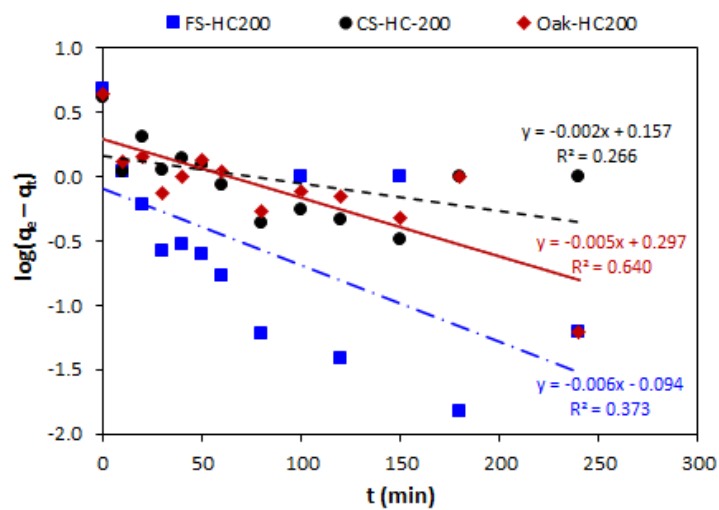

(a)

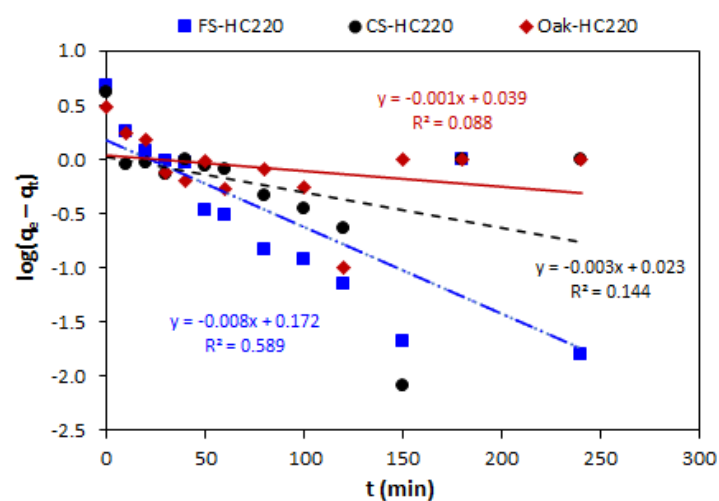

(b)

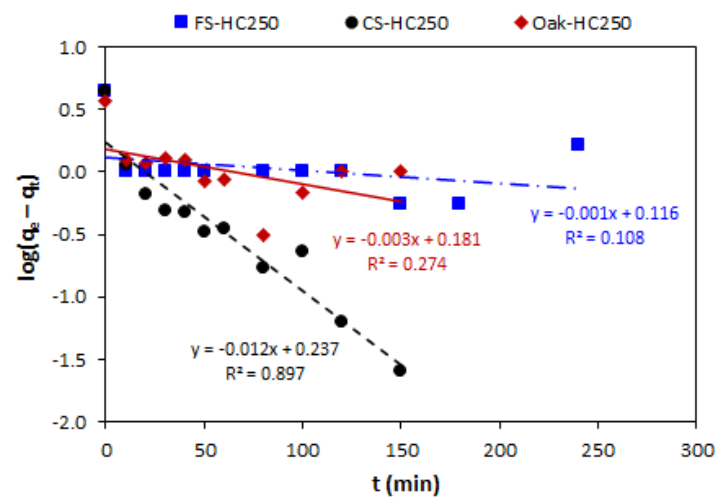

(c)

**Figure S1.** Pseudo first-order adsorption kinetics plots for hydrochars produced at: (a) 200 °C; (b) 220 °C; and (c) 250 °C.

**Table S1.** Pseudo first-order kinetic parameters for adsorption of MB dye onto FS, CS, and Oak hydrochars.

| Adsorbent | Pseudo first-order         |              |       |
|-----------|----------------------------|--------------|-------|
|           | $k_1$ (min <sup>-1</sup> ) | $q_e$ (mg/g) | $R^2$ |
| FS-HC200  | 0.006                      | 0.81         | 0.37  |
| CS-HC200  | 0.002                      | 1.44         | 0.27  |
| Oak-HC200 | 0.005                      | 1.98         | 0.64  |
| FS-HC220  | 0.008                      | 1.49         | 0.59  |
| CS-HC220  | -0.003                     | 1.05         | 0.14  |
| Oak-HC220 | 0.001                      | 1.09         | 0.09  |
| FS-HC250  | 0.001                      | 1.31         | 0.11  |
| CS-HC250  | 0.012                      | 1.73         | 0.90  |
| Oak-HC250 | 0.003                      | 1.52         | 0.27  |

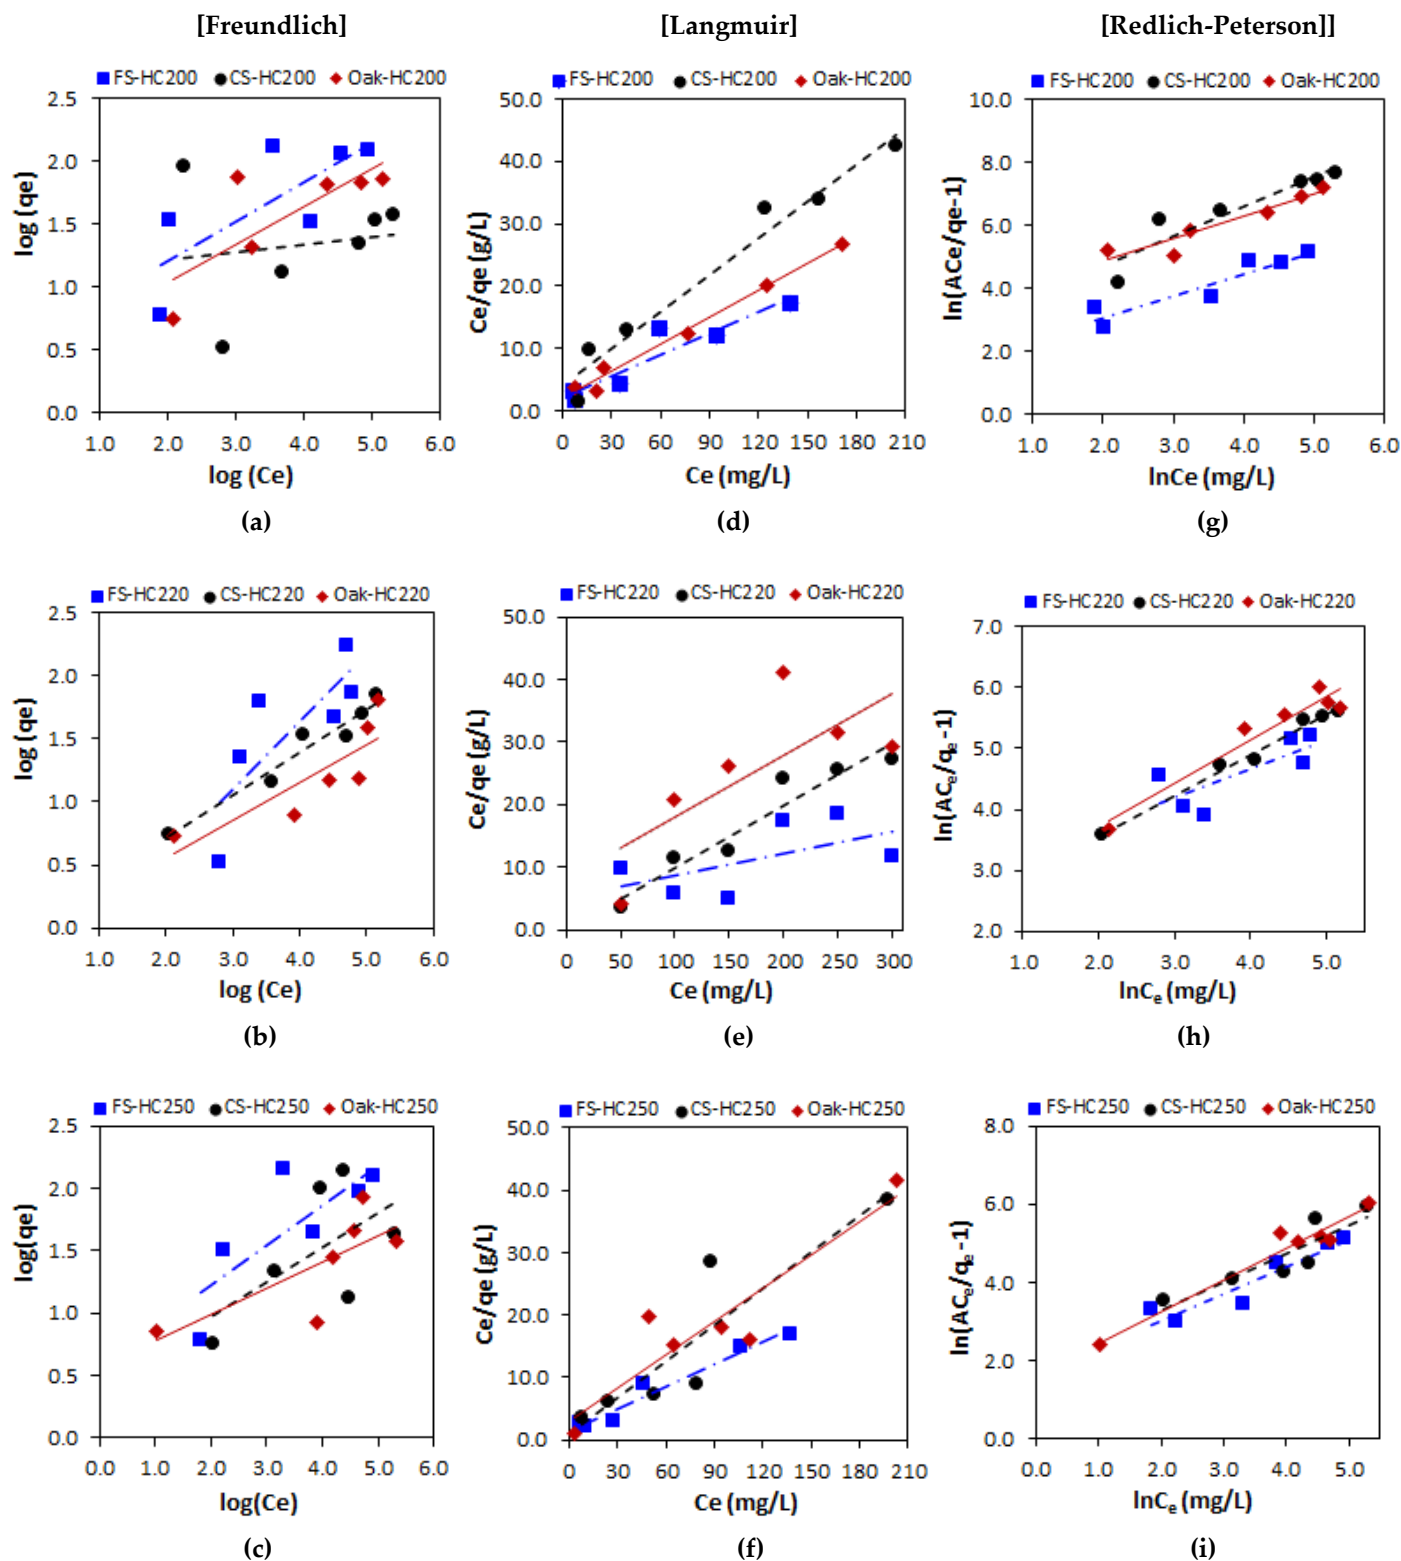

**Figure S2.** Freundlich (a–c), Langmuir (d–f), and Redlich-Peterson (g–i) adsorption isotherm models of MB on FS-HCs, CS-HCs and Oak-HCs produced at (a, d, g) 200 °C; (b, e, h) 220 °C; and (c, f, i) 250 °C.

**Table S2.** Analysis of variance (ANOVA) for initial concentration models.

| Source                                  | Sum of squares | DF | Mean square | F value | P value  |                 |
|-----------------------------------------|----------------|----|-------------|---------|----------|-----------------|
| <i>Adsorption capacity - FS</i>         |                |    |             |         |          |                 |
| Model: Linear                           | 234.70         | 2  | 117.35      | 47.23   | < 0.0001 | significant     |
| HTC Temperature (T)                     | 0.2701         | 1  | 0.2701      | 0.1087  | 0.7430   | not significant |
| Initial concentration (C <sub>0</sub> ) | 234.70         | 1  | 234.70      | 94.47   | < 0.0001 | significant     |
| Residual                                | 124.22         | 50 | 2.48        |         |          |                 |
| Lack of fit                             | 47.75          | 15 | 3.18        | 1.46    | 0.1759   | not significant |
| Pure Error                              | 76.47          | 35 | 2.18        |         |          |                 |
| Corrected total                         | 358.52         | 52 |             |         |          |                 |
| R <sup>2</sup>                          | 0.654          |    |             |         |          |                 |
| <i>Percentage removal - FS</i>          |                |    |             |         |          |                 |
| Model: Linear                           | 4987.66        | 2  | 2493.83     | 10.73   | 0.0001   | significant     |
| Temperature (T)                         | 46.75          | 1  | 46.75       | 0.2011  | 0.6558   | not significant |
| Initial concentration (C <sub>0</sub> ) | 4898.42        | 1  | 4898.42     | 21.07   | < 0.0001 | significant     |
| Residual                                | 11624.49       | 50 | 232.49      |         |          |                 |
| Lack of fit                             | 5372.27        | 15 | 358.15      | 2.00    | 0.0449   | significant     |
| Pure Error                              | 6252.22        | 35 | 178.63      |         |          |                 |
| Corrected total                         | 16612.15       | 52 |             |         |          |                 |
| R <sup>2</sup>                          | 0.300          |    |             |         |          |                 |
| <i>Adsorption capacity - CS</i>         |                |    |             |         |          |                 |
| Model: Quadratic                        | 97.00          | 5  | 19.40       | 8.79    | < 0.0001 | significant     |
| Temperature (T)                         | 2.43           | 1  | 2.43        | 1.10    | 0.2991   | not significant |
| Initial concentration (C <sub>0</sub> ) | 77.24          | 1  | 77.24       | 35.01   | < 0.0001 | significant     |
| TC <sub>0</sub>                         | 1.91           | 1  | 1.91        | 0.8665  | 0.3566   | not significant |
| T <sup>2</sup>                          | 0.0006         | 1  | 0.0006      | 0.0003  | 0.9872   | not significant |
| C <sub>0</sub> <sup>2</sup>             | 16.85          | 1  | 16.85       | 7.64    | 0.0081   | significant     |
| Residual                                | 105.90         | 48 | 2.21        |         |          |                 |
| Lack of fit                             | 52.48          | 12 | 4.37        | 2.95    | 0.0060   | significant     |
| Pure Error                              | 53.42          | 36 | 1.48        |         |          |                 |
| Corrected total                         | 202.90         | 53 |             |         |          |                 |
| R <sup>2</sup>                          | 0.478          |    |             |         |          |                 |
| <i>Removal efficiency - CS</i>          |                |    |             |         |          |                 |
| Model: Linear                           | 10537.97       | 2  | 5268.99     | 17.30   | < 0.0001 | significant     |
| Temperature (T)                         | 661.34         | 1  | 661.34      | 2.17    | 0.1467   | not significant |
| Initial concentration (C <sub>0</sub> ) | 9876.64        | 1  | 9876.64     | 32.43   | < 0.0001 | significant     |
| Residual                                | 15531.82       | 51 | 304.55      |         |          |                 |
| Lack of fit                             | 8922.67        | 15 | 594.84      | 3.24    | 0.0019   | significant     |
| Pure Error                              | 6609.15        | 36 | 183.59      |         |          |                 |
| Corrected total                         | 26069.80       | 53 |             |         |          |                 |
| R <sup>2</sup>                          | 0.404          |    |             |         |          |                 |

Non-significant lack of fit is required. FS = Fucus Serratus hydrochar; CS = Coconut shell hydrochar; Oak = Oak hydrochar.

**Table S2.** Analysis of variance (ANOVA) for initial concentration models – Continues.

| Source                                  | Sum of squares | DF | Mean square | F value | P value  |                 |
|-----------------------------------------|----------------|----|-------------|---------|----------|-----------------|
| <i>Adsorption capacity - Oak</i>        |                |    |             |         |          |                 |
| Model: Quadratic                        | 123.16         | 5  | 24.63       | 14.34   | < 0.0001 | significant     |
| Temperature (T)                         | 9.45           | 1  | 9.45        | 5.50    | 0.0232   | significant     |
| Initial concentration (C <sub>0</sub> ) | 89.58          | 1  | 89.58       | 52.15   | < 0.0001 | significant     |
| TC <sub>0</sub>                         | 0.0348         | 1  | 0.0348      | 0.0202  | 0.8874   | not significant |
| T <sup>2</sup>                          | 20.30          | 1  | 20.30       | 11.82   | 0.0012   | significant     |
| C <sub>0</sub> <sup>2</sup>             | 6.32           | 1  | 6.32        | 3.68    | 0.0611   | not significant |
| Residual                                | 82.44          | 48 | 1.72        |         |          |                 |
| Lack of fit                             | 27.51          | 12 | 2.29        | 1.50    | 0.1686   | not significant |
| Pure Error                              | 54.94          | 36 | 1.53        |         |          |                 |
| Corrected total                         | 205.60         | 53 |             |         |          |                 |
| R <sup>2</sup>                          | 0.599          |    |             |         |          |                 |
| <i>Percentage removal -Oak</i>          |                |    |             |         |          |                 |
| Model: Quadratic                        | 14310.34       | 5  | 2862.07     | 13.20   | < 0.0001 | significant     |
| Temperature (T)                         | 836.80         | 1  | 836.80      | 3.86    | 0.0553   | not significant |
| Initial concentration (C <sub>0</sub> ) | 10450.94       | 1  | 10450.94    | 48.20   | < 0.0001 | significant     |
| TC <sub>0</sub>                         | 0.0069         | 1  | 0.0069      | 0.0000  | 0.9955   | not significant |
| T <sup>2</sup>                          | 2588.33        | 1  | 2588.33     | 11.94   | 0.0012   | significant     |
| C <sub>0</sub> <sup>2</sup>             | 660.59         | 1  | 660.59      | 3.05    | 0.0873   | not significant |
| Residual                                | 10406.95       | 48 | 216.81      |         |          |                 |
| Lack of fit                             | 4796.91        | 12 | 399.74      | 2.57    | 0.0144   | significant     |
| Pure Error                              | 5610.04        | 36 | 155.83      |         |          |                 |
| Corrected total                         | 24717.29       | 53 |             |         |          |                 |
| R <sup>2</sup>                          | 0.579          |    |             |         |          |                 |

Non-significant lack of fit is good. FS = Fucus Serratus hydrochar; CS = Coconut shell hydrochar; Oak = Oak hydrochar.

**Table S3.** Analysis of variance (ANOVA) for initial pH models.

| Source                          | Sum of squares | DF | Mean square | F value | P value  |                 |
|---------------------------------|----------------|----|-------------|---------|----------|-----------------|
| <i>Percentage removal - FS</i>  |                |    |             |         |          |                 |
| Model: Quadratic                | 1764.87        | 5  | 352.97      | 6.62    | < 0.0001 | significant     |
| HTC Temperature (T)             | 808.93         | 1  | 808.93      | 15.17   | 0.0003   | significant     |
| Initial pH (pH)                 | 185.52         | 1  | 185.52      | 3.48    | 0.0682   | not significant |
| T.pH                            | 348.37         | 1  | 348.37      | 6.53    | 0.0138   | significant     |
| T <sup>2</sup>                  | 15.15          | 1  | 15.15       | 0.2842  | 0.5964   | not significant |
| pH <sup>2</sup>                 | 459.51         | 1  | 459.51      | 8.62    | 0.0051   | significant     |
| Residual                        | 2559.10        | 48 | 53.31       |         |          |                 |
| Lack of fit                     | 1570.07        | 12 | 130.84      | 4.76    | 0.0001   | significant     |
| Pure Error                      | 989.03         | 36 | 27.47       |         |          |                 |
| Corrected total                 | 4323.97        | 53 |             |         |          |                 |
| R <sup>2</sup>                  | 0.408          |    |             |         |          |                 |
| <i>Percentage removal - CS</i>  |                |    |             |         |          |                 |
| Model: 2FI                      | 7232.86        | 3  | 2410.95     | 9.26    | < 0.0001 | significant     |
| Temperature (T)                 | 86.17          | 1  | 86.17       | 0.3309  | 0.5677   | not significant |
| Initial pH (pH)                 | 6316.58        | 1  | 6316.58     | 24.26   | < 0.0001 | significant     |
| T.pH                            | 1235.01        | 1  | 1235.01     | 4.74    | 0.0342   | significant     |
| Residual                        | 13018.43       | 50 | 260.37      |         |          |                 |
| Lack of fit                     | 9656.74        | 14 | 689.77      | 7.39    | < 0.0001 | significant     |
| Pure Error                      | 3361.69        | 36 | 93.38       |         |          |                 |
| Corrected total                 | 20251.29       | 53 |             |         |          |                 |
| R <sup>2</sup>                  | 0.357          |    |             |         |          |                 |
| <i>Removal efficiency - Oak</i> |                |    |             |         |          |                 |
| Model: Linear                   | 9456.24        | 2  | 4728.12     | 46.25   | < 0.0001 | significant     |
| Temperature (T)                 | 411.40         | 1  | 411.40      | 4.02    | 0.0502   |                 |
| Initial pH (pH)                 | 9044.84        | 1  | 9044.84     | 88.48   | < 0.0001 | significant     |
| Residual                        | 5213.27        | 51 | 102.22      |         |          |                 |
| Lack of fit                     | 2107.56        | 15 | 140.50      | 1.63    | 0.1144   | not significant |
| Pure Error                      | 3105.71        | 36 | 86.27       |         |          |                 |
| Corrected total                 | 14669.51       | 53 |             |         |          |                 |
| R <sup>2</sup>                  | 0.645          |    |             |         |          |                 |

Non-significant lack of fit is required. FS = Fucus Serratus hydrochar; CS = Coconut shell hydrochar; Oak = Oak hydrochar.

**Table S4.** Analysis of variance (ANOVA) for contact time models.

| Source                          | Sum of squares | DF  | Mean square | F value | P value  |                 |
|---------------------------------|----------------|-----|-------------|---------|----------|-----------------|
| <i>Percentage removal - FS</i>  |                |     |             |         |          |                 |
| Model: Quadratic                | 35124.46       | 5   | 7024.89     | 19.30   | < 0.0001 | significant     |
| HTC Temperature (T)             | 1562.68        | 1   | 1562.68     | 4.29    | 0.0406   | significant     |
| Contact time (t)                | 6211.25        | 1   | 6211.25     | 17.07   | < 0.0001 | significant     |
| Tt                              | 1748.71        | 1   | 1748.71     | 4.81    | 0.0305   | significant     |
| T <sup>2</sup>                  | 530.58         | 1   | 530.58      | 1.46    | 0.2298   | not significant |
| t <sup>2</sup>                  | 19079.58       | 1   | 19079.58    | 52.43   | < 0.0001 | significant     |
| Residual                        | 40393.07       | 111 | 363.90      |         |          |                 |
| Lack of fit                     | 38466.70       | 33  | 1165.66     | 47.20   | < 0.0001 | significant     |
| Pure Error                      | 1926.37        | 78  | 24.70       |         |          |                 |
| Corrected total                 | 75517.53       | 116 |             |         |          |                 |
| R <sup>2</sup>                  | 0.465          |     |             |         |          |                 |
|                                 |                |     |             |         |          |                 |
| <i>Percentage removal - CS</i>  |                |     |             |         |          |                 |
| Model: Quadratic                | 34858.10       | 5   | 6971.62     | 28.97   | < 0.0001 | significant     |
| HTC Temperature (T)             | 2233.14        | 1   | 2233.14     | 9.28    | 0.0029   | significant     |
| Contact time (t)                | 15143.77       | 1   | 15143.77    | 62.93   | < 0.0001 | significant     |
| Tt                              | 180.87         | 1   | 180.87      | 0.7516  | 0.3879   | not significant |
| T <sup>2</sup>                  | 0.9238         | 1   | 0.9238      | 0.0038  | 0.9507   | not significant |
| t <sup>2</sup>                  | 8825.64        | 1   | 8825.64     | 36.67   | < 0.0001 | significant     |
| Residual                        | 26712.85       | 111 | 240.66      |         |          |                 |
| Lack of fit                     | 23609.20       | 33  | 715.43      | 17.98   | < 0.0001 | significant     |
| Pure Error                      | 3103.65        | 78  | 39.79       |         |          |                 |
| Corrected total                 | 61570.95       | 116 |             |         |          |                 |
| R <sup>2</sup>                  | 0.566          |     |             |         |          |                 |
|                                 |                |     |             |         |          |                 |
| <i>Removal efficiency - Oak</i> |                |     |             |         |          |                 |
| Model: Quadratic                | 37580.10       | 5   | 7516.02     | 35.50   | < 0.0001 | significant     |
| HTC Temperature (T)             | 2373.70        | 1   | 2373.70     | 11.21   | 0.0011   | significant     |
| Contact time (t)                | 17635.89       | 1   | 17635.89    | 83.29   | < 0.0001 | significant     |
| Tt                              | 34.96          | 1   | 34.96       | 0.1651  | 0.6853   | not significant |
| T <sup>2</sup>                  | 7070.94        | 1   | 7070.94     | 33.39   | < 0.0001 | significant     |
| t <sup>2</sup>                  | 5169.98        | 1   | 5169.98     | 24.42   | < 0.0001 | significant     |
| Residual                        | 23502.98       | 111 | 211.74      |         |          |                 |
| Lack of fit                     | 17723.88       | 33  | 537.09      | 7.25    | < 0.0001 | significant     |
| Pure Error                      | 5779.10        | 78  | 74.09       |         |          |                 |
| Corrected total                 | 61083.08       | 116 |             |         |          |                 |
| R <sup>2</sup>                  | 0.615          |     |             |         |          |                 |

Non-significant lack of fit is required. FS = Fucus Serratus hydrochar; CS = Coconut shell hydrochar; Oak = Oak hydrochar.



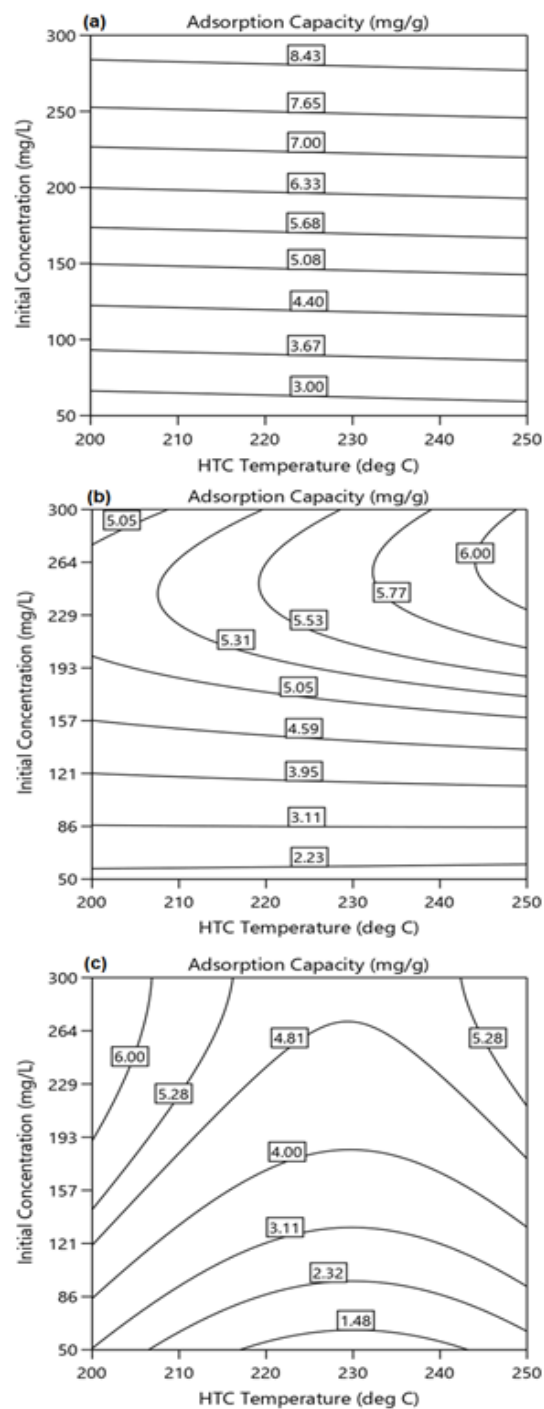

**Figure S3.** Contour plots showing the effect of initial MB dye concentration and HTC temperature on adsorption capacity: (a) FS-HCs; (b) CS-HCs; and (c) Oak-HCs.

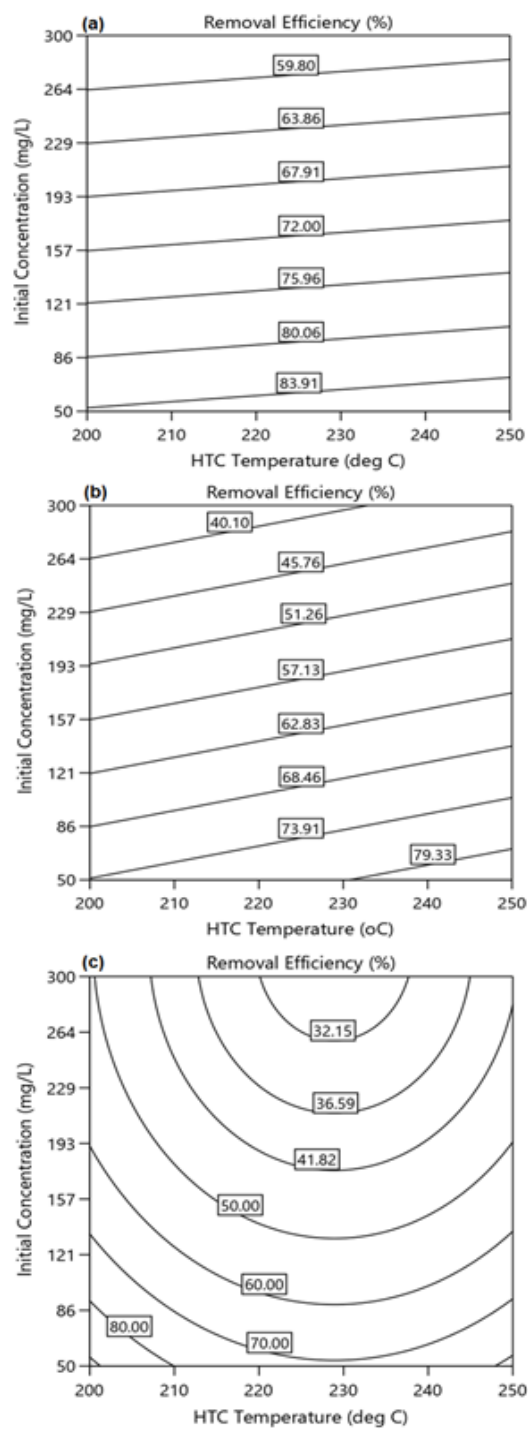

**Figure S4.** Contour plots showing the effect of initial MB concentration and HTC temperature on adsorption removal efficiency: (a) FS-HCs; (b) CS-HCs; and (c) Oak-HCs.

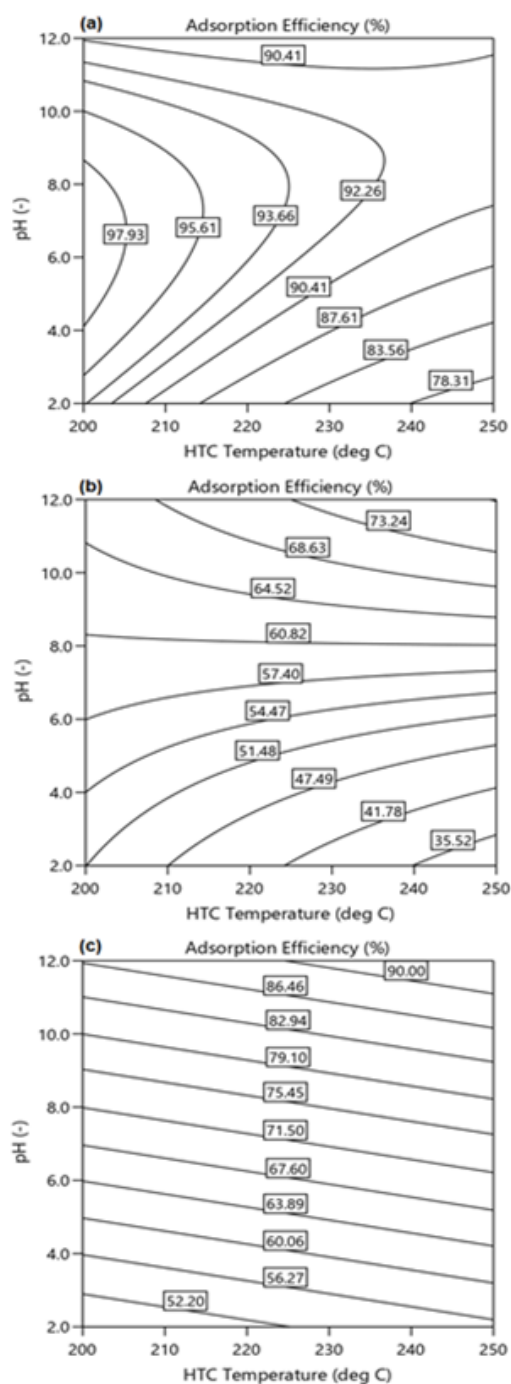

**Figure S5.** Contour plots showing the effect of solution pH and HTC temperature on adsorption removal efficiency: (a) FS-HCs; (b) CS-HCs; and (c) Oak-HCs.

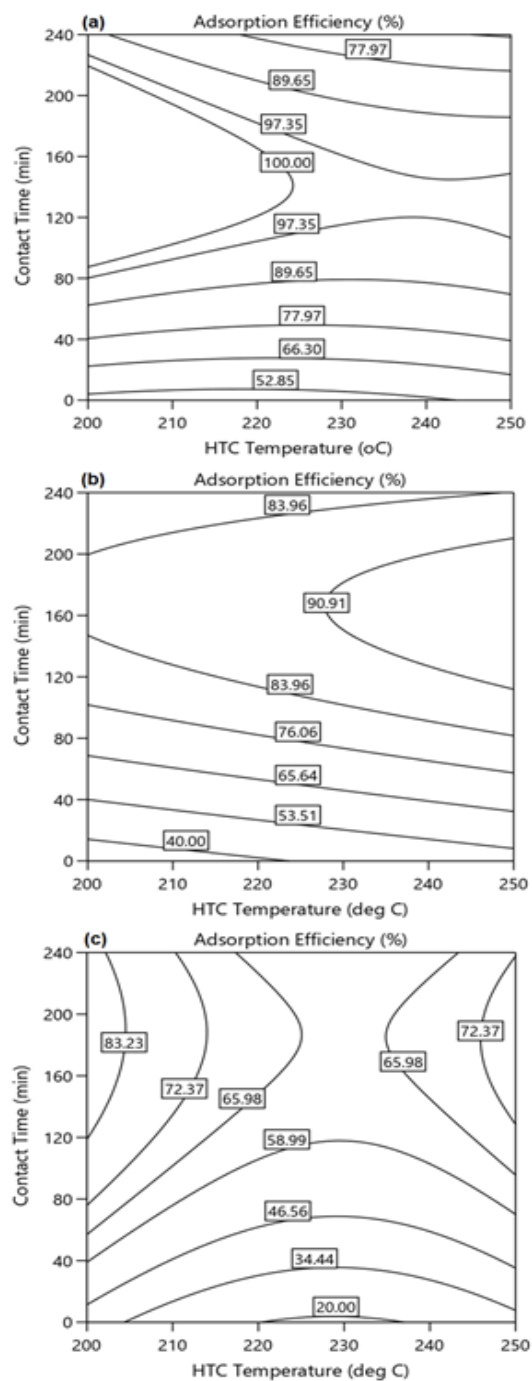

**Figure S6.** Contour plots showing the effect of adsorption time and HTC temperature on adsorption removal efficiency: (a) FS-HCs; (b) CS-HCs; and (c) Oak-HCs.
